# Supplementary material
Source: Springer Nature journal article supplement (https://www.springermedizin.de/resource/supplementary/12985_2013_2486_MOESM2_ESM.pdf/9606832)

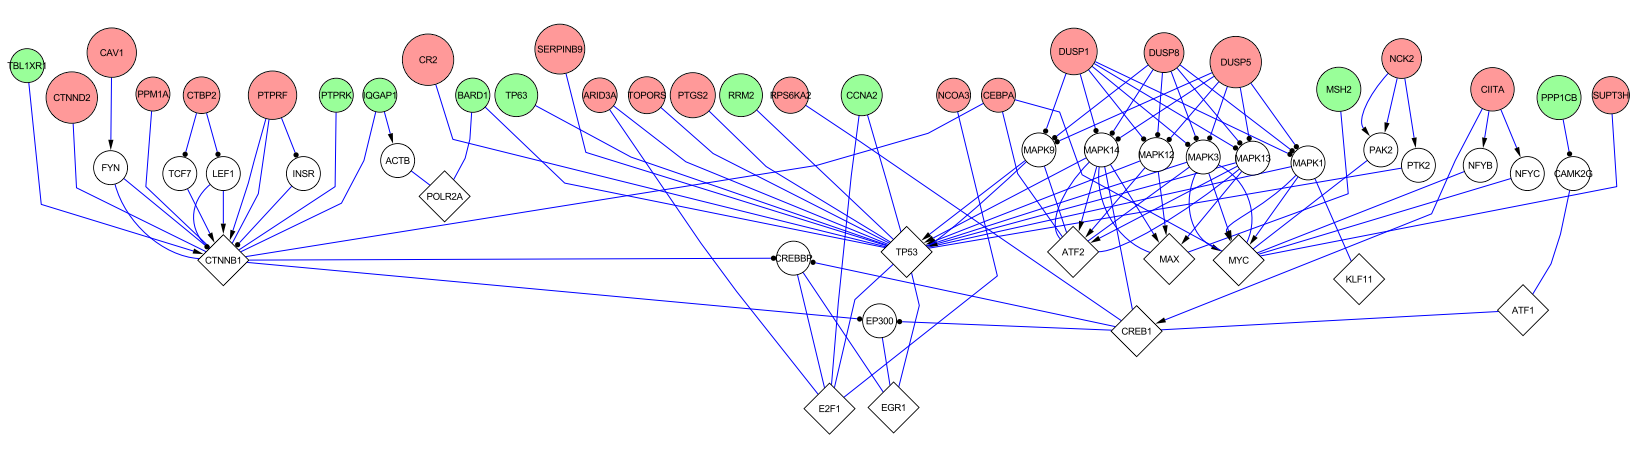

Supplement: MOESM2 [file 9606832]
